# Supplementary material for: Design of a highly potent GLP-1R and GCGR dual-agonist for recovering hepatic fibrosis
Source: PubMed Central journal article supplement — Acta Pharm Sin B. 2021 Dec 29;12(5):2443–61. doi: 10.1016/j.apsb.2021.12.016 (PMC9136578; doi:10.1016/j.apsb.2021.12.016), 2021-12-29
Supplement: mmc1.pdf [file mmc1.pdf]

## Supporting Information for

### Original article

## Design of a highly potent GLP-1R and GCGR dual-agonist for recovering hepatic fibrosis

Nazi Song<sup>a,†</sup>, Hongjiao Xu<sup>a,†</sup>, Jiahua Liu<sup>b,†</sup>, Qian Zhao<sup>a,†</sup>, Hui Chen<sup>a</sup>, Zhibin Yan<sup>c</sup>, Runling Yang<sup>c</sup>, Zhiteng Luo<sup>a</sup>, Qi Liu<sup>d</sup>, Jianmei Ouyang<sup>d</sup>, Shuohan Wu<sup>a</sup>, Suijia Luo<sup>d</sup>, Shuyin Ye<sup>d</sup>, Runfeng Lin<sup>a</sup>, Xi Sun<sup>b</sup>, Junqiu Xie<sup>c</sup>, Tian Lan<sup>c</sup>, Zhongdao Wu<sup>b,\*</sup>, Rui Wang<sup>c,\*</sup>, Xianxing Jiang<sup>a,\*</sup>

<sup>a</sup>*School of Pharmaceutical Sciences, Guangdong Provincial Key Laboratory of Chiral Molecule and Drug Discovery, Sun Yat-sen University, Guangzhou 510006, China*

<sup>b</sup>*Department of Parasitology of Zhongshan School of Medicine, Sun Yat-sen University; Key Laboratory of Tropical Disease Control, Ministry of Education, Sun Yat-sen University; Provincial Engineering Technology Research Center for Biological Vector Control, Sun Yat-sen University, Guangzhou 510006, China*

<sup>c</sup>*Research Unit of Peptide Science, Chinese Academy of Medical Sciences; Key Laboratory of Preclinical Study for New Drugs of Gansu Province, School of Basic Medical Sciences, Lanzhou University, Lanzhou 730000, China*

<sup>d</sup>*Shenzhen Turier Biotech. Co., Ltd., Shenzhen 518118, China*

<sup>e</sup>*Guangdong Pharmaceutical University, Guangzhou 510006, China*

<sup>†</sup>These authors made equal contributions to this work.

\*Corresponding authors. Tel./fax: +86 20 39943082.

E-mail addresses: jiangxx5@mail.sysu.edu.cn (Xianxing Jiang), wangrui@lzu.edu.cn (Rui Wang), wuzhd@mail.sysu.edu.cn (Zhongdao Wu).

Received 22 September 2021; received in revised form 29 November 2021; accepted 20 December 2021

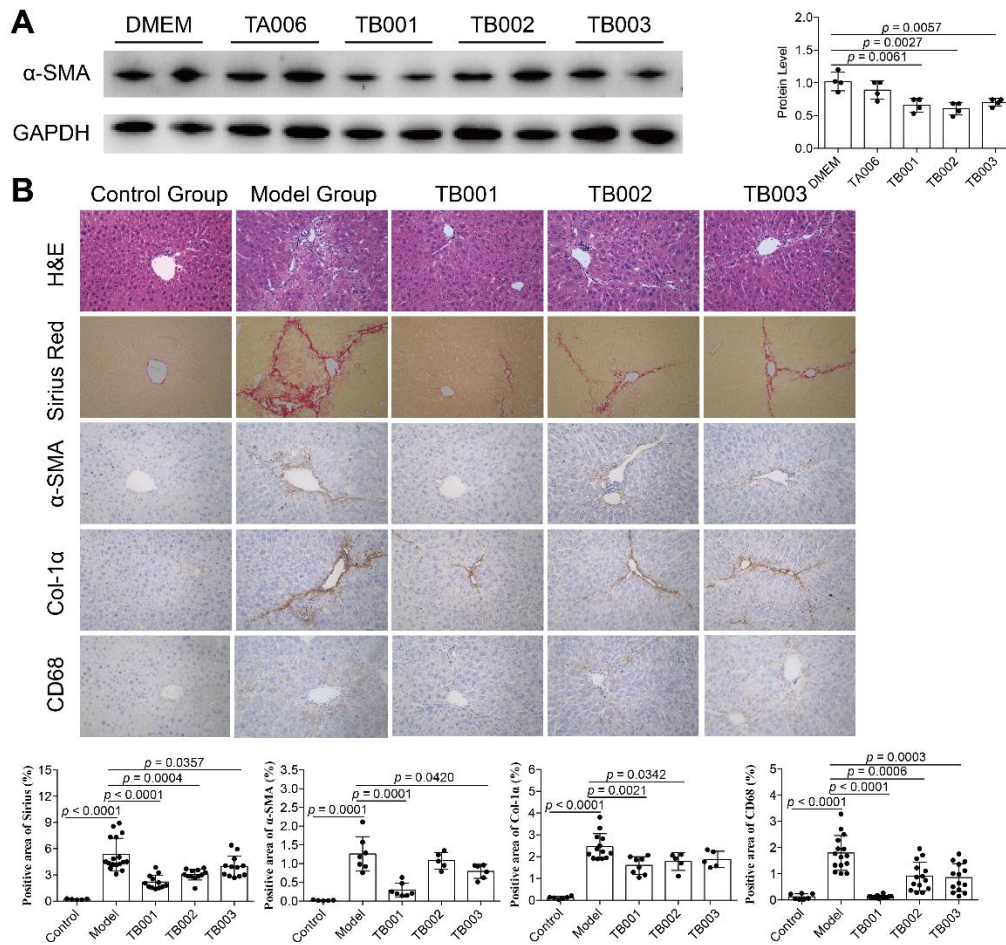

**Figure S1** Peptide screening *in vitro* or *in vivo*. (A) Western blotting for  $\alpha$ -SMA expression in LX2 cells after peptides treated. Three separated experiments were performed.  $\alpha$ -SMA expression was normalized to that of GAPDH. Positive areas were analyzed with ImageJ. (B) Representative images of HE staining, sirius red staining and IHC for  $\alpha$ -SMA, Col-1 $\alpha$  and CD68 of liver sections on mice treated with Corn Oil, CCl<sub>4</sub> or CCl<sub>4</sub> plus TB001, TB002 and TB003 therapy. Here and later, for each assay, three separated experiments were performed. And for each experiment ( $n = 4$  cell samples/group or  $n = 6$  mice/group). For the *in vivo* experiment, the doses of TB001-TB003 are 60  $\mu$ g/kg. All the above data are presented as mean values  $\pm$  SEM using unpaired Student's t test.

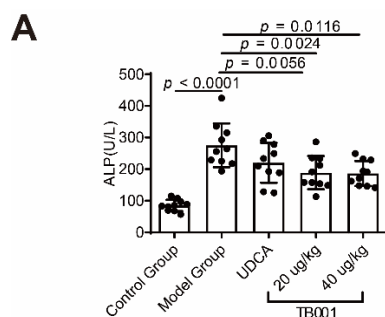

**Figure S2** Serum ALP levels in ANIT-induced rat liver fibrosis. (A) Serum ALP of mice in the indicated groups were measured ( $n = 10$ ).

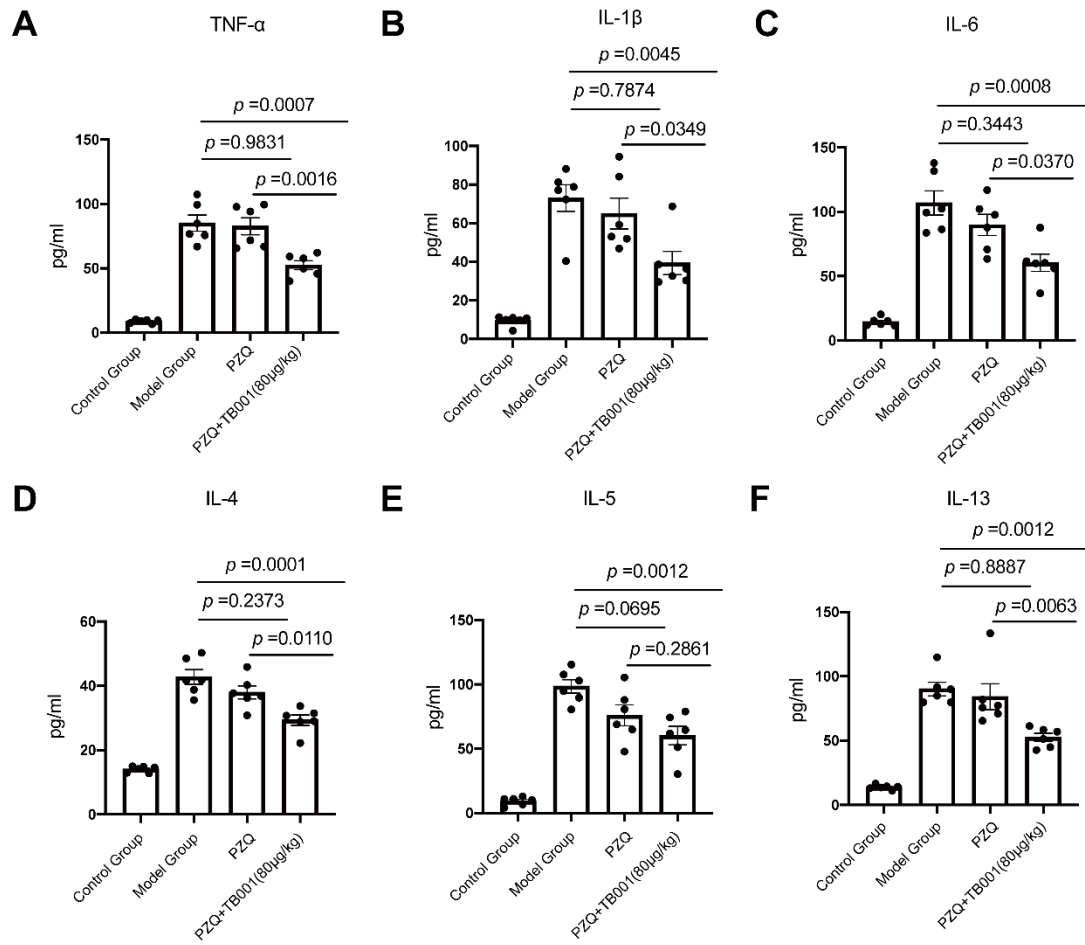

**Figure S3** TB001 alleviated hepatocytes damage and inflammation in *Schistosoma japonicum*-induced mouse hepatic fibrosis model. (A–C) measurement of serum TNF- $\alpha$ , IL-1 $\beta$ , IL-6, IL-4, IL-5, and IL-13 levels were lower in mice treated with TB001 by ELISA assays ( $n = 5$ ). All the above data are presented as mean values  $\pm$  SEM using unpaired Student's  $t$  test.

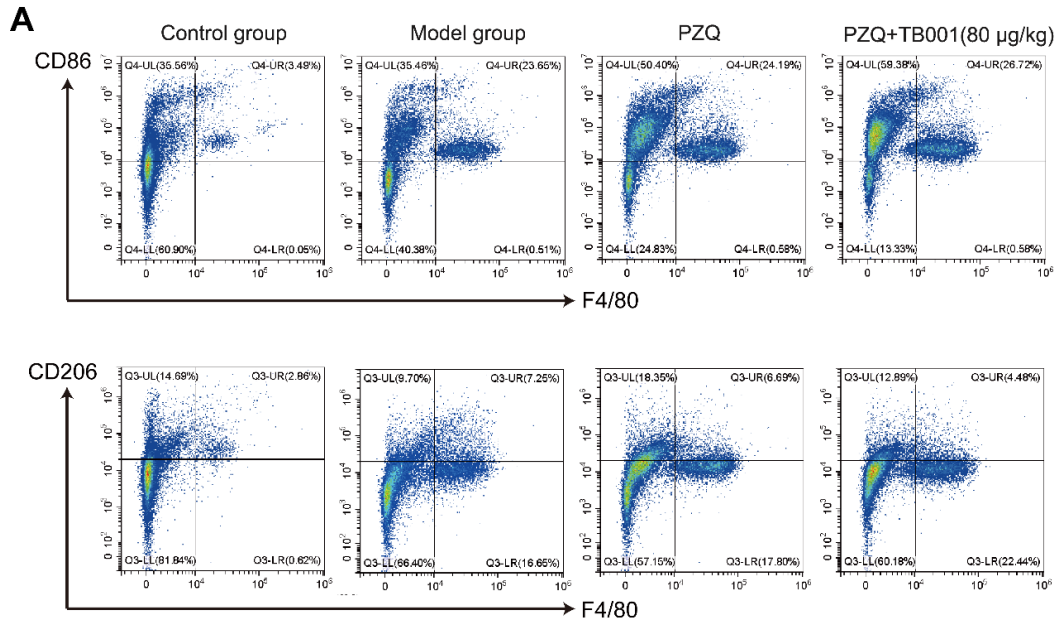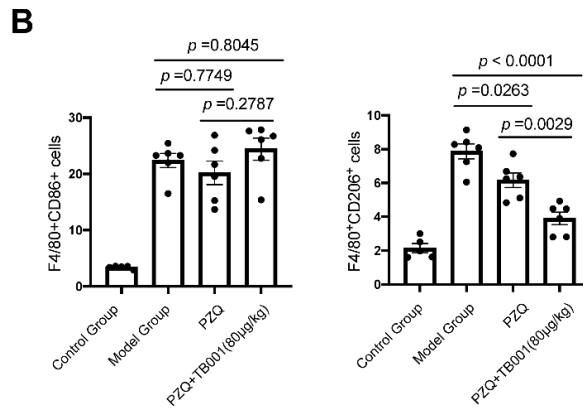

**Figure S4** TB001 restore the immune microenvironment homeostasis in schistosomiasis (A–B) The number of F4/80+CD86+ M1 cells ( $n = 5$ ) and F4/80+CD206+ M2 cells ( $n = 5$ ) in each of mice liver were analyzed by flow cytometry. All the above data are presented as mean values  $\pm$  SEM using unpaired Student's *t* test.

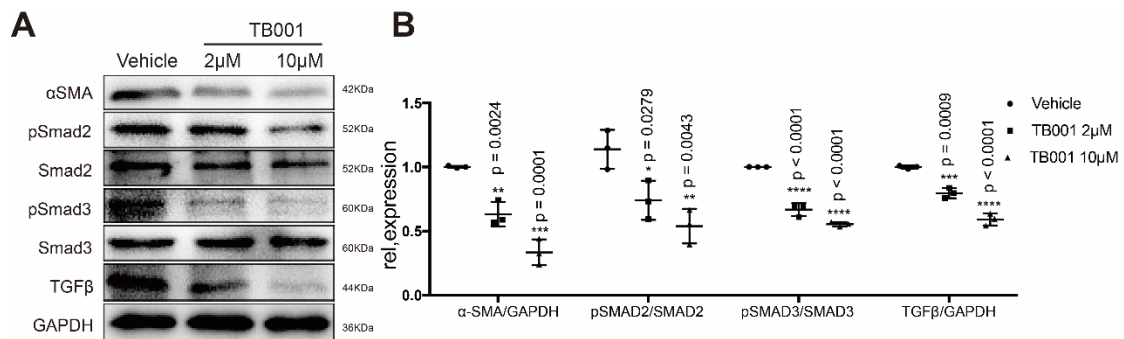

**Figure S5** TB001 ameliorates hepatic fibrosis via TGFβ/Smad signal pathway in LX2 cell model. (A–B) Western blotting assay of Smad2/3, pSmad2/3 and TGFβ measured in HSCs with or without TB001 treating. GAPDH serves as the loading control. All the above data are presented as mean values  $\pm$  SEM using unpaired Student's *t* test.

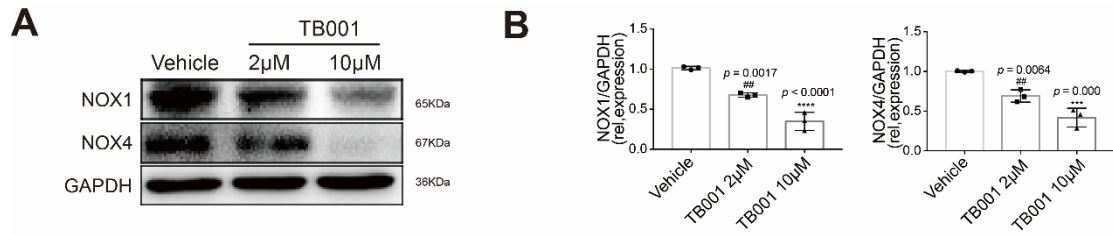

**Figure S6** TB001 resolves inflammation caused by hepatic fibrosis in LX2 cell model. (A–B) LX2 cells were treated with TB001 and the expression of NOX1/4 were measured by Western blot. All the above data are presented as mean values  $\pm$  SEM using unpaired Student's *t* test.

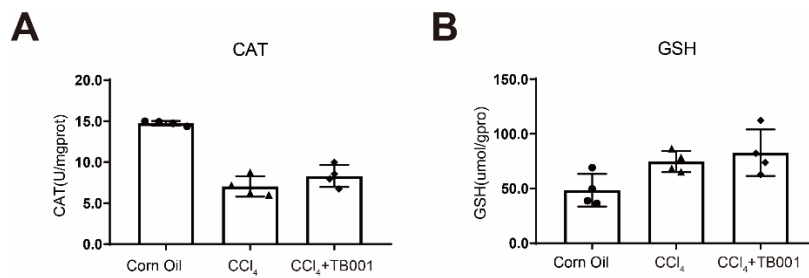

**Figure S7** TB001 resolves oxidative stress caused by hepatic fibrosis in primary hepatocytes. (A) anti-oxidative stress function of primary hepatocytes manifested by CAT and GSH ( $n = 4$ ). All the above data are presented as mean values  $\pm$  SEM using unpaired Student's *t* test.

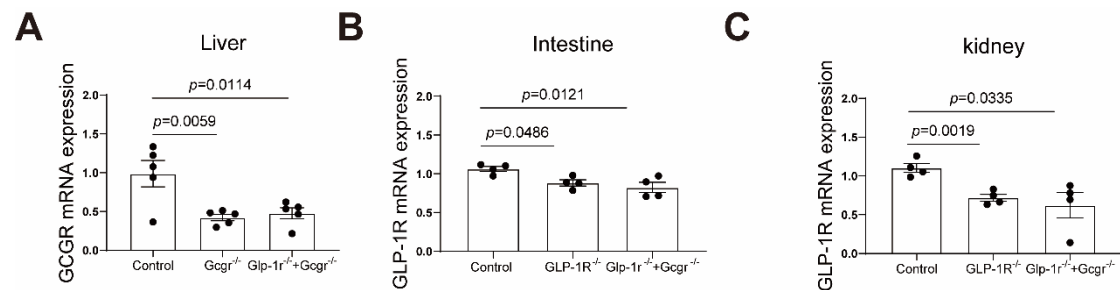

**Figure S8** Evaluation of Gcgr or Glp-1r knock-down effect in mice. (A) The mRNA levels of Gcgr of liver in Gcgr or Glp-1r knock-down mice ( $n = 5$ ). (B–C) The mRNA levels of Glp-1r of intestines and kidney in Gcgr or Glp-1r knock-down mice ( $n = 4$ ). All the above data are presented as mean values  $\pm$  SEM using unpaired Student's *t* test.

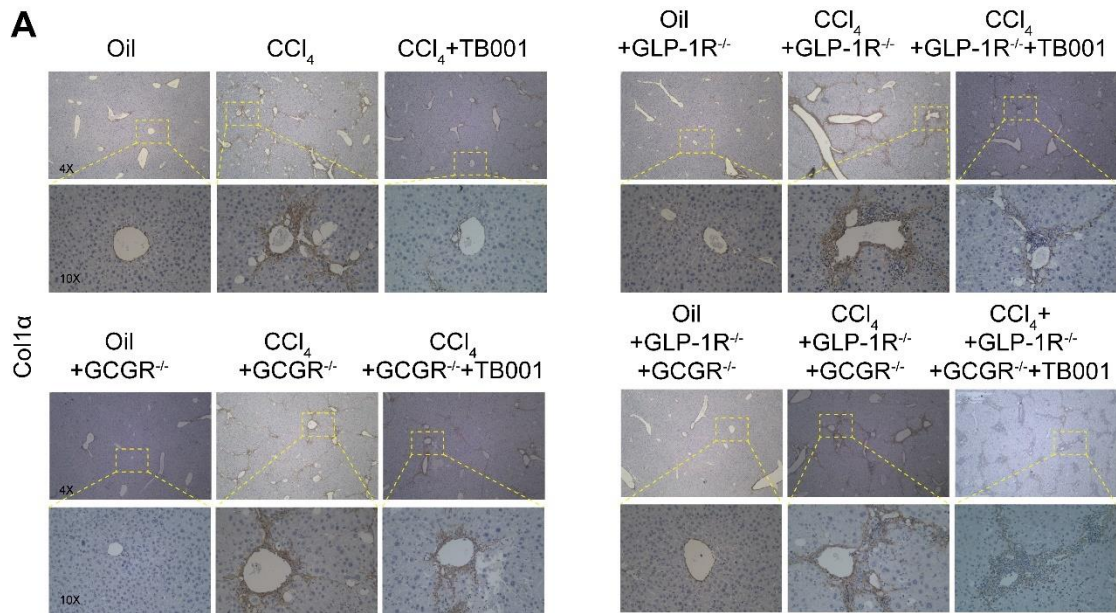

**Figure S9** TB001 ameliorate the progress of CCl<sub>4</sub>-induced mouse liver fibrosis by targeting GLP-1R/GCGR. (A) Sirius Red staining of mice liver sections representative images from each group ( $n = 5$ ).

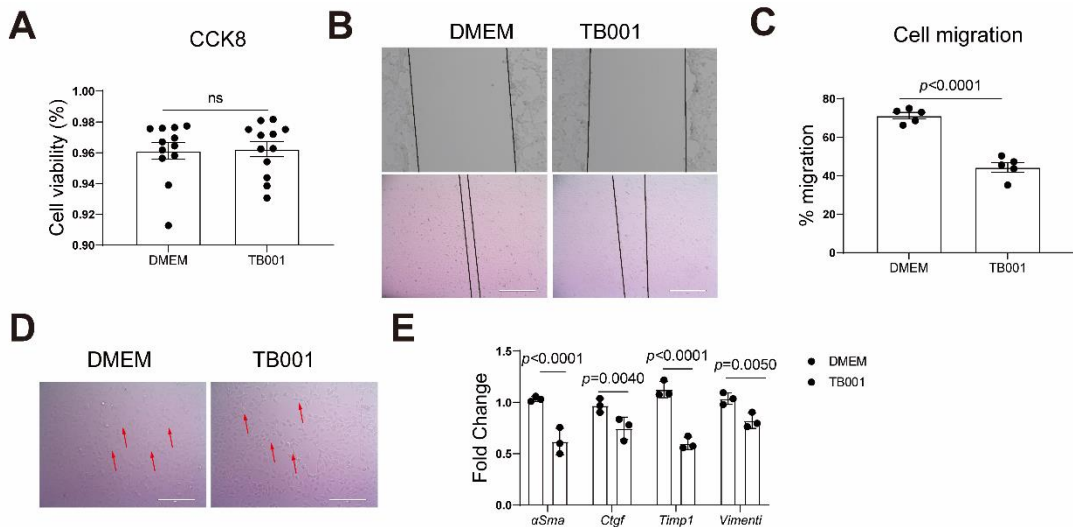

**Figure S10** TB001 ameliorates hepatic fibrosis via regulating specific phenotypic changes of LX2 cells. (A) Evaluation of TB001 on LX2 cell proliferation ( $n = 3$ ). (B–C) Results of the scratch wound-healing experiment demonstrate that TB001 treatments led to fewer cells migrating ( $n = 3$ ). (D) TB001 promote LX2 contraction ( $n = 3$ ). (E) qPCR analysis of genes related to HSC activation ( *$\alpha$ Sma*, *Ctgf*, *Timp1*, *Vimentin*) ( $n = 3$ ). All the above data are presented as mean values  $\pm$  SEM using unpaired Student's *t* test.

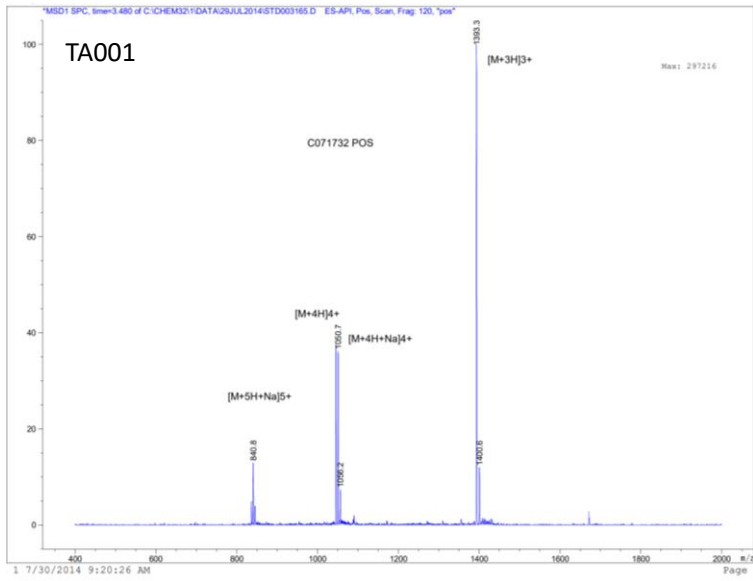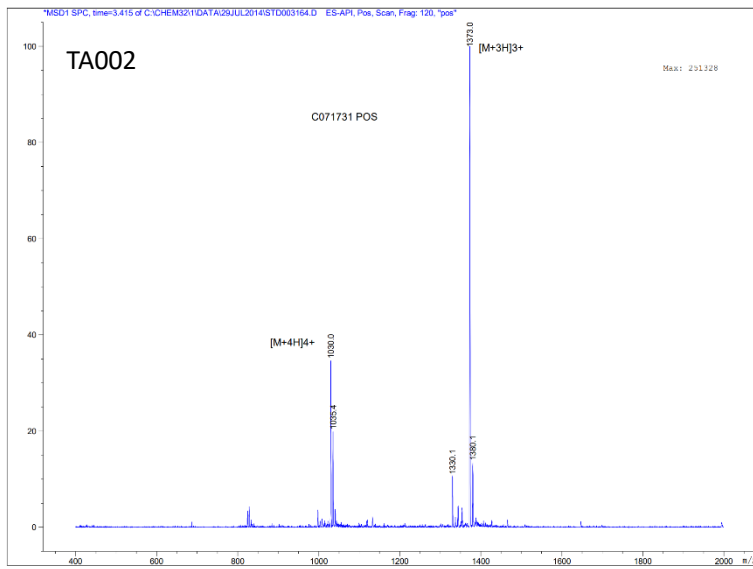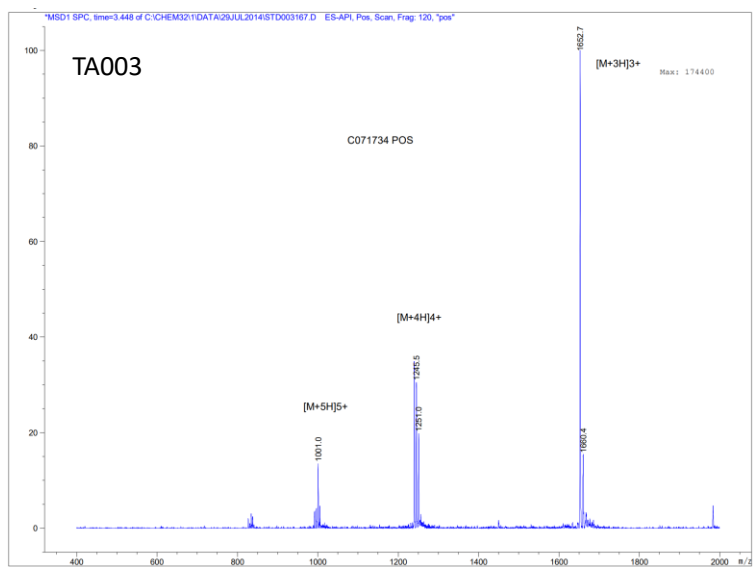

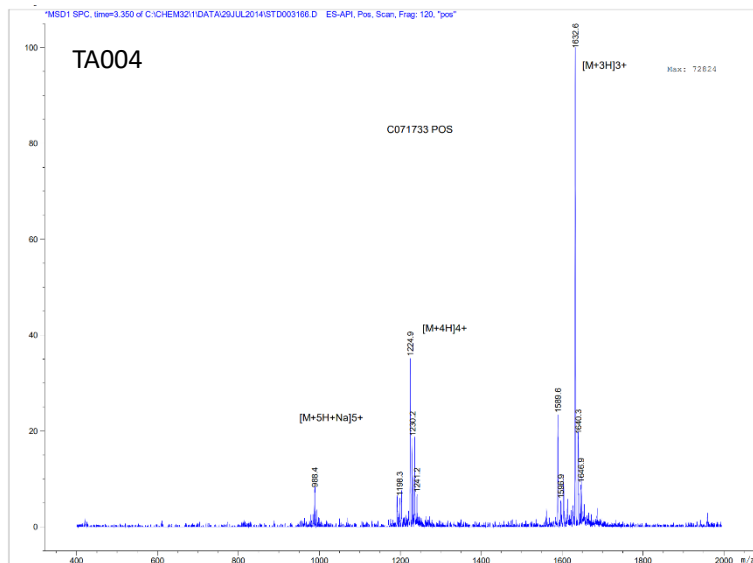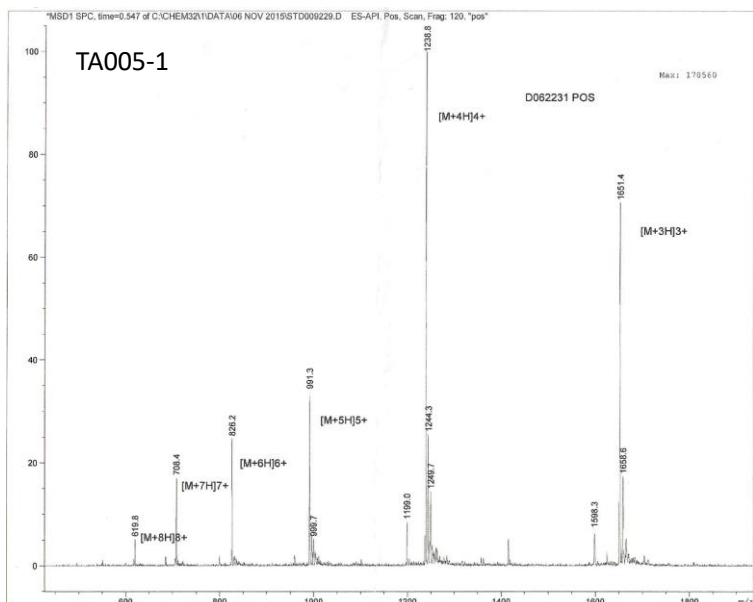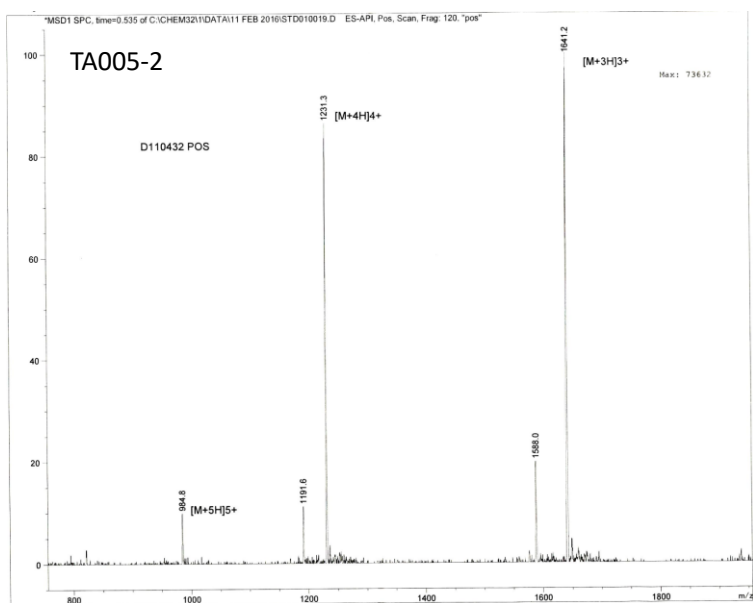



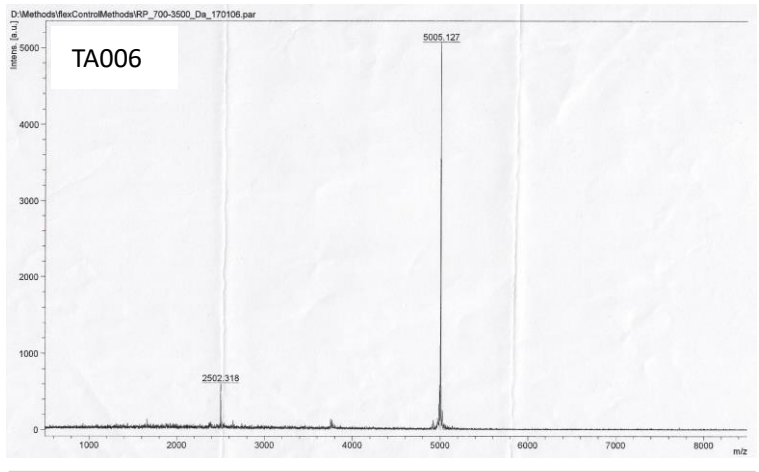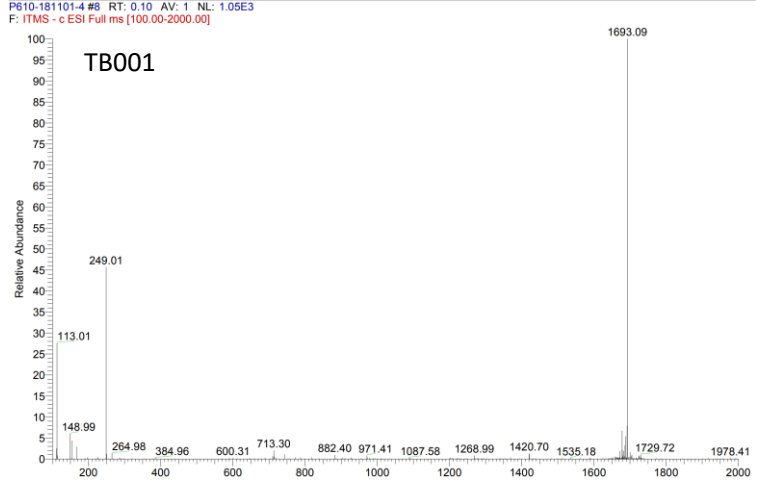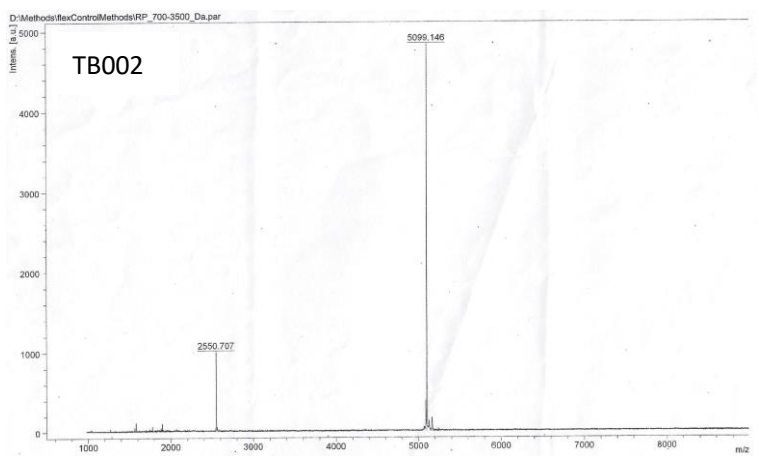

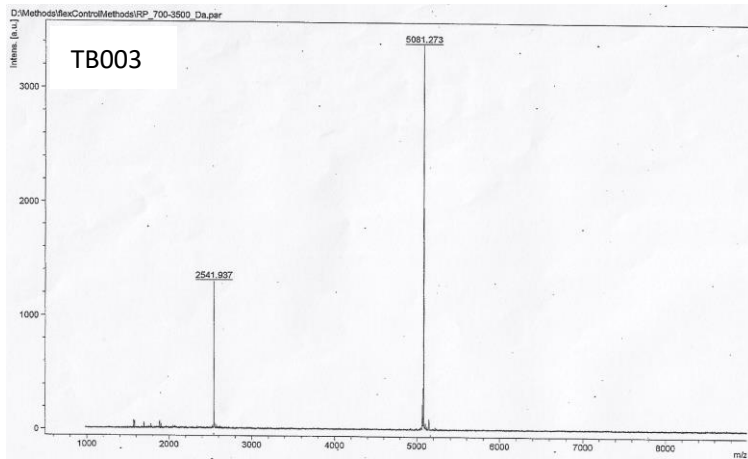

**Figure S11** Confirmation of atomic accumulation of candidate peptides with electrospray ionisation-mass spectrometry.

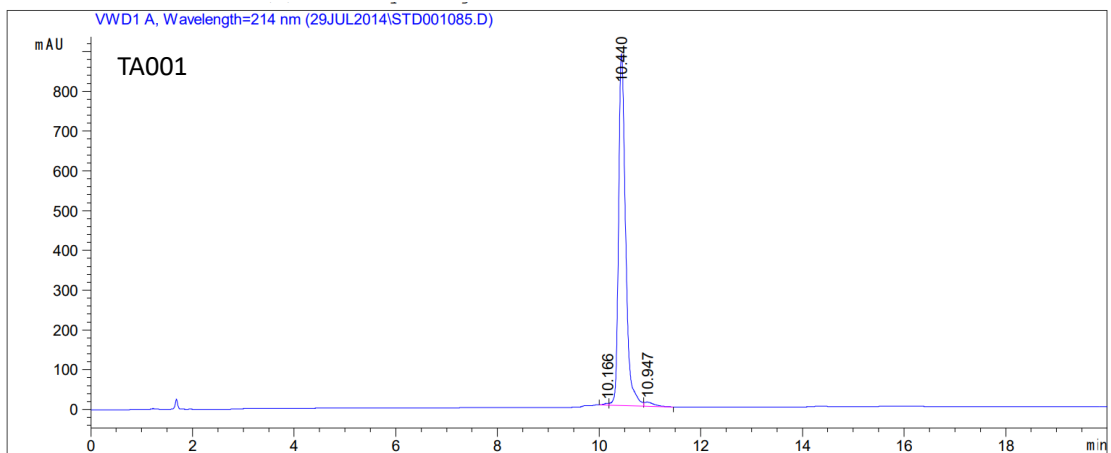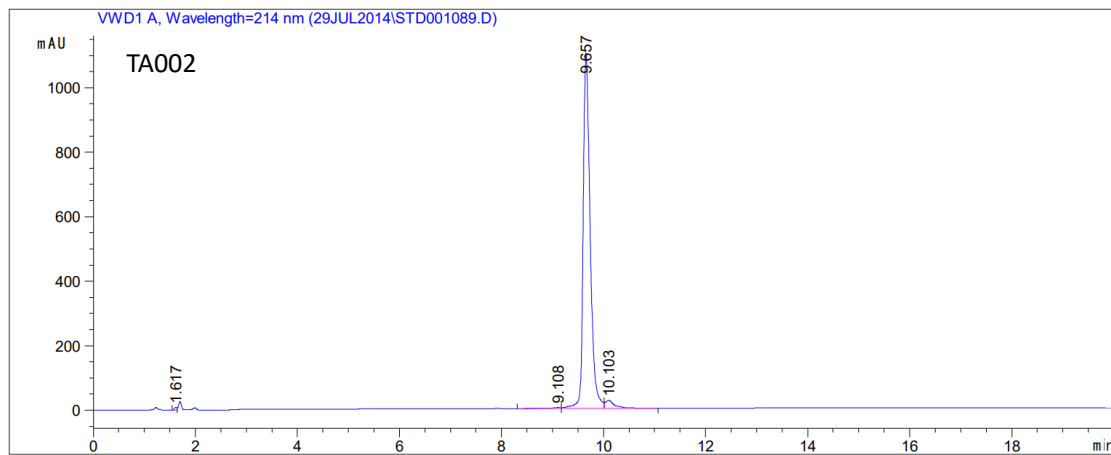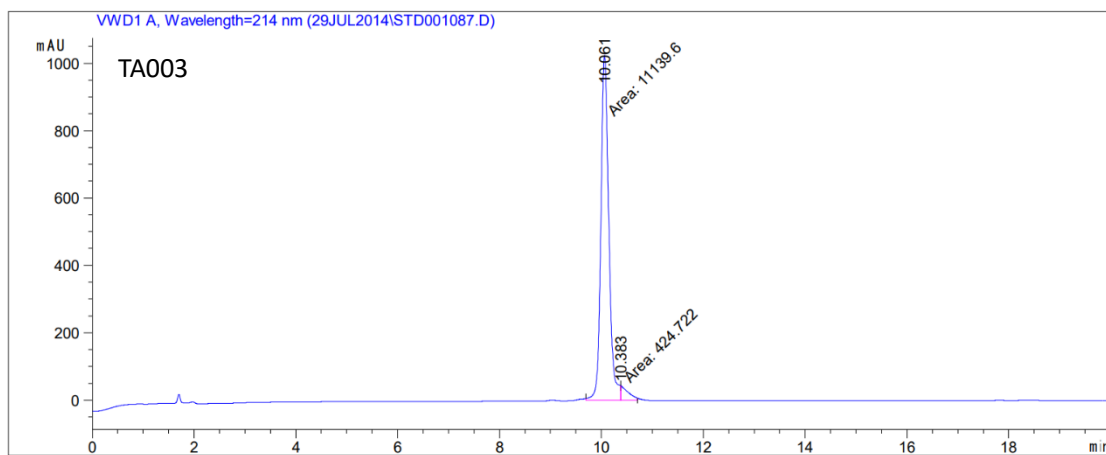

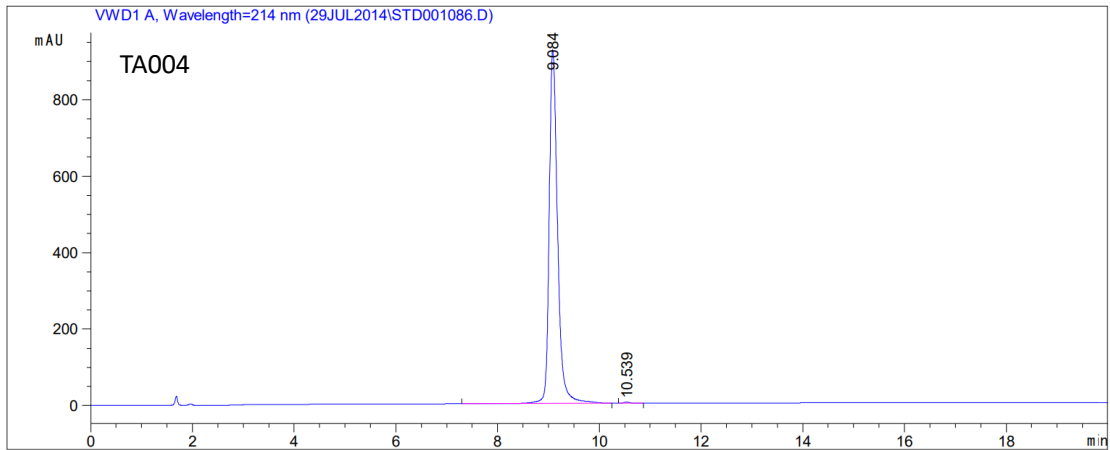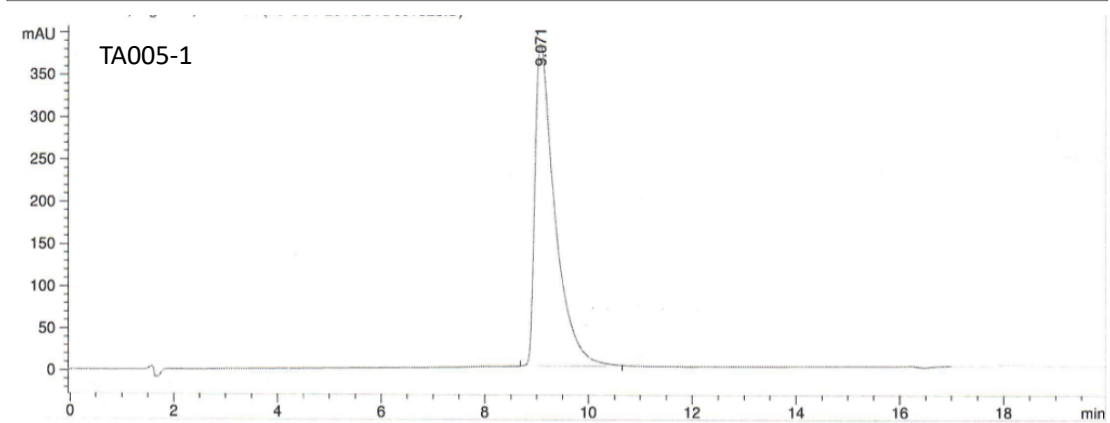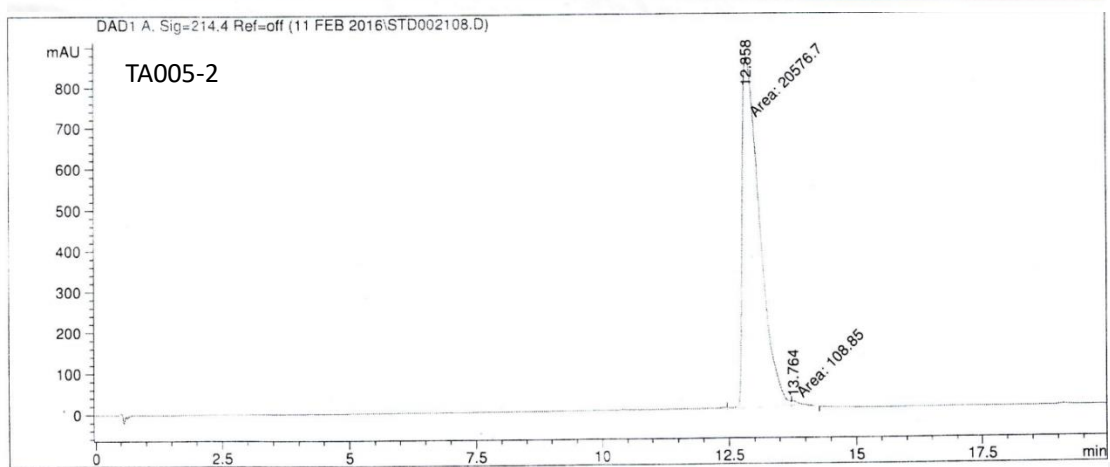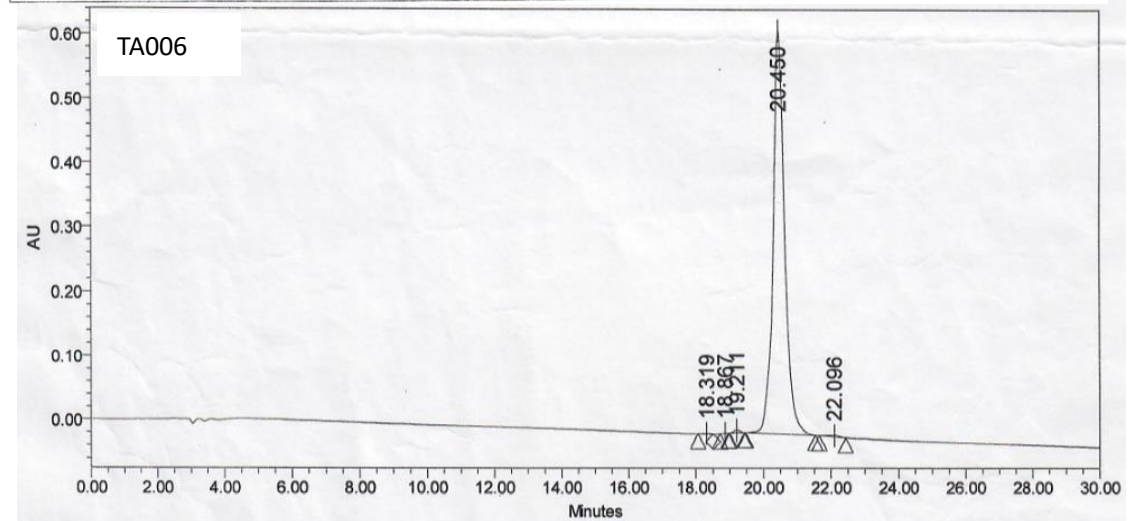

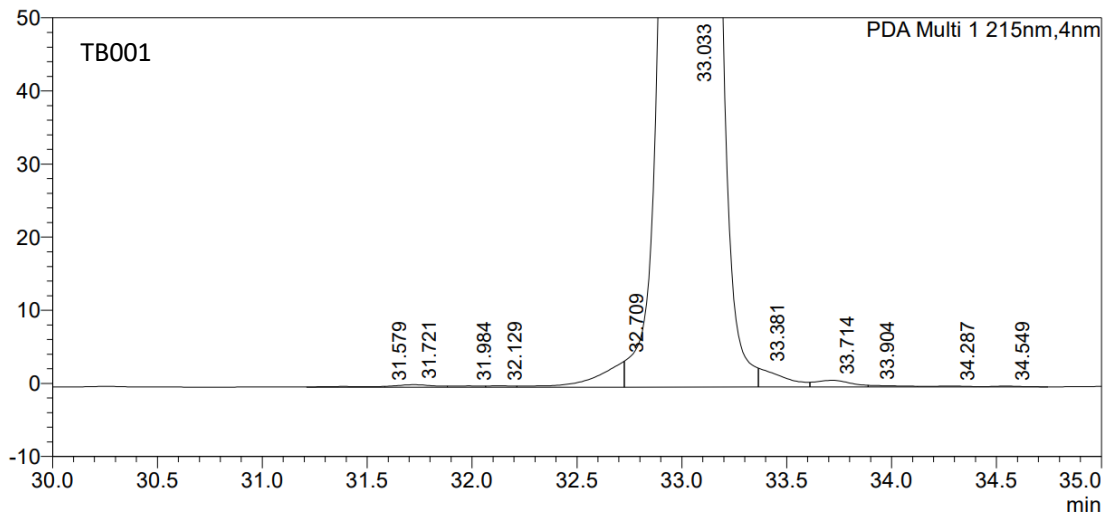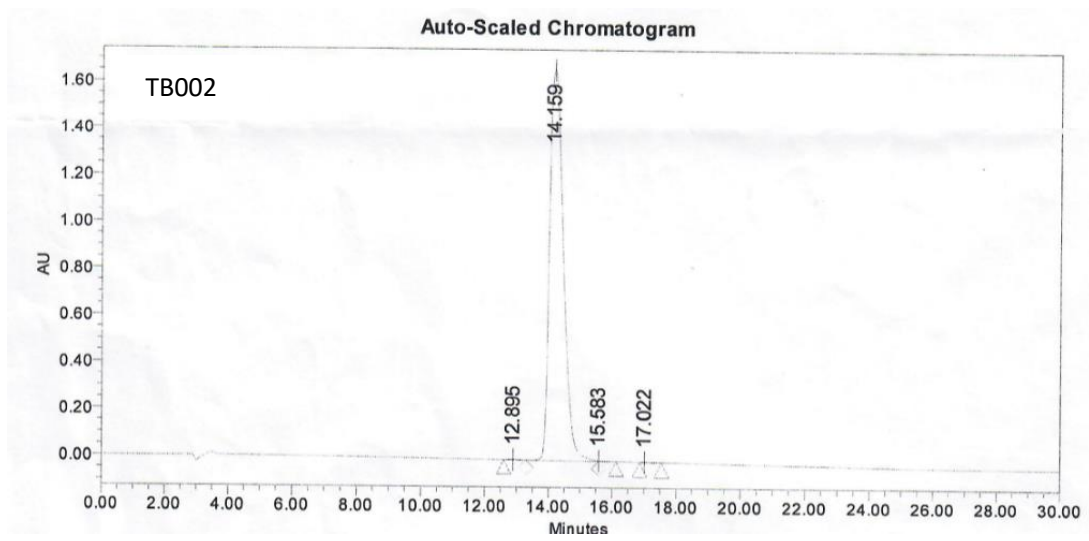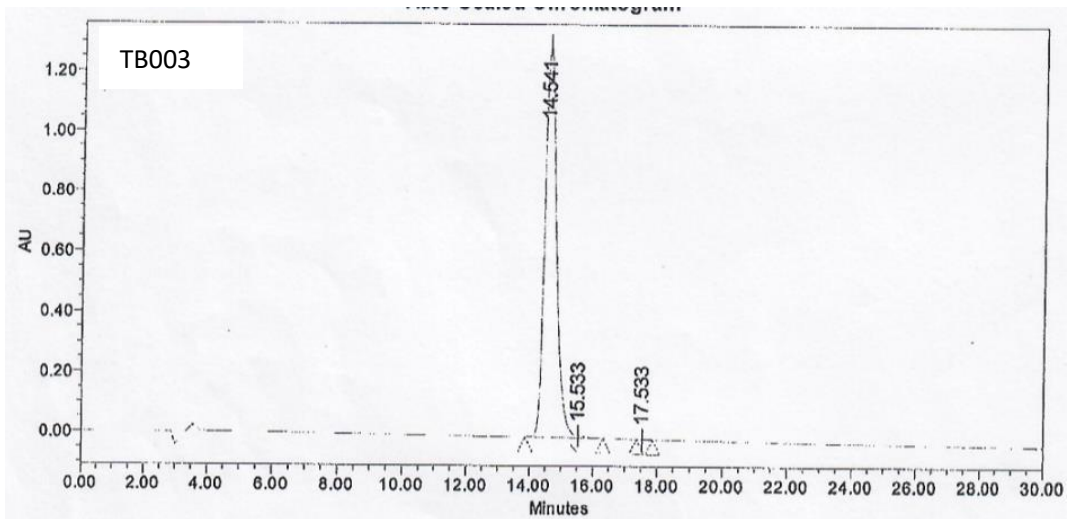

**Figure S12** Purification of candidate peptides with reverse phase high performance liquid chromatography mass spectrometric (RP-HPLC-MS).

**Table S1** Glucagon and GLP-1 receptor-mediated cAMP synthesis by chimeric peptide analogs.

| Peptide     | GCGR         | GLP-1R       | GCGR       | GLP-1R     | Selectivity ratio |
|-------------|--------------|--------------|------------|------------|-------------------|
|             | EC50(nmol/L) | EC50(nmol/L) | Relative % | Relative % | GCGR: GLP-1R      |
| Glucagon    | 0.97         | 131.10       | 100.00     | 1.00       | 100.00            |
| Liraglutide | >1000        | 0.04         | <0.1       | 100.00     | <0.1              |
| TA001       | 3197.00      | 1.13         | 0.03       | 3.54       | 0.01              |
| TA002       | 433.00       | 0.32         | 0.22       | 12.50      | 0.02              |
| TA003       | 31.99        | 0.68         | 3.03       | 5.88       | 0.52              |
| TA004       | 103.22       | 0.19         | 0.94       | 21.05      | 0.04              |
| TA005-1     | 8.68         | 1.55         | 11.18      | 2.58       | 4.33              |
| TA005-2     | 5.32         | 0.93         | 18.23      | 4.30       | 4.24              |
| TA006       | 3.22         | 2.50         | 30.12      | 1.60       | 18.83             |
| TB001       | 0.01         | 0.04         | 970.00     | 100.00     | 9.70              |
| TB002       | 1.19         | 0.98         | 81.51      | 4.08       | 19.97             |
| TB003       | 4.23         | 1.14         | 22.93      | 3.51       | 6.54              |

**Table S2** Summary of the pharmacokinetic parameters of TB001 in rhesus monkey ( $n=6$ ).

|                                        | Single dose    |              |              |              | Multiple dose, sc. 20 ug/kg |              |
|----------------------------------------|----------------|--------------|--------------|--------------|-----------------------------|--------------|
|                                        | iv. 15.3 ug/kg | sc. 5 ug/kg  | sc. 20 ug/kg | sc. 60 ug/kg | Day 1                       | Day 7        |
| $t_{1/2}$ (h)                          | 0.498 ± 0.0100 | 3.33 ± 1.57  | 2.83 ± 1.42  | 2.47 ± 0.571 | 3.07 ± 1.28                 | 1.94 ± 0.305 |
| $T_{max}$ (h)                          | NA             | 1.67 ± 0.516 | 1.83 ± 0.408 | 2.67 ± 1.03  | 2.00                        | 2.00         |
| $C_{max}$ (ng/mL)                      | NA             | 1.96 ± 0.570 | 12.0 ± 3.90  | 43.4 ± 19.6  | 9.82 ± 4.72                 | 14.8 ± 5.35  |
| $AUC_{0 \rightarrow t}$ (h·ng/mL)      | 289 ± 46.2     | 9.19 ± 2.73  | 75.5 ± 21.3  | 301 ± 92.2   | 62.3 ± 19.5                 | 90.7 ± 28.3  |
| $AUC_{0 \rightarrow \infty}$ (h·ng/mL) | 290 ± 46.4     | 11.8 ± 2.99  | 83.0 ± 19.9  | 314 ± 95.5   | 68.3 ± 17.6                 | 93.7 ± 29.2  |
| CL (mL/min/kg)                         | 0.897 ± 0.132  | NA           | NA           | NA           | NA                          | NA           |
| $V_{ss}$ (mL/kg)                       | 37.9 ± 3.47    | NA           | NA           | NA           | NA                          | NA           |
| MRT (h)                                | 0.669 ± 0.136  | 5.68 ± 2.00  | 5.85 ± 1.57  | 5.70 ± 0.708 | 6.04 ± 1.51                 | 4.72 ± 0.386 |
| $F$ (%)                                | NA             | 13.1 ± 2.79  | 22.0 ± 4.95  | 27.5 ± 6.06  | NA                          | NA           |

NA, not applicable; data are presented as mean±SD.

**Table S3** Selected biochemistry parameters in rats for repeated dose toxicity in Sprague–Dawley rat ( $n=10$ ).

| Group         | Male ( $n=5$ ) |              |               |               | Female ( $n=5$ ) |              |               |               |
|---------------|----------------|--------------|---------------|---------------|------------------|--------------|---------------|---------------|
|               | Control        | sc. 20 ug/kg | sc. 100 ug/kg | sc. 500 ug/kg | Control          | sc. 20 ug/kg | sc. 100 ug/kg | sc. 500 ug/kg |
| AST (U/L)     | 112.7 ± 39.5   | 111.2 ± 22.9 | 131.6 ± 37.7  | 150.8 ± 16.0  | 86.3 ± 16.7      | 78.5 ± 10.3  | 120.7 ± 36.1  | 103.9 ± 36.0  |
| ALT (U/L)     | 35.2 ± 3.8     | 34.6 ± 6.1   | 45.0 ± 17.3   | 42.2 ± 8.8    | 26.0 ± 3.2       | 30.6 ± 4.0   | 26.6 ± 3.7    | 25.8 ± 6.7    |
| ALP (U/L)     | 169.5 ± 63.4   | 150.2 ± 30.7 | 174.4 ± 95.5  | 174.3 ± 38.7  | 90.9 ± 23.6      | 69.1 ± 9.3   | 78.8 ± 10.2   | 86.3 ± 23.8   |
| TBIL (μmol/L) | 0.8 ± 0.3      | 1.0 ± 0.3    | 1.4 ± 0.1*    | 1.4 ± 0.2*    | 1.0 ± 0.4        | 0.9 ± 0.5    | 1.3 ± 0.7     | 2.2 ± 0.4*    |
| CHOL (mmol/L) | 1.46 ± 0.28    | 1.25 ± 0.21  | 0.61 ± 0.14*  | 0.45 ± 0.10*  | 1.40 ± 0.19      | 1.41 ± 0.30  | 0.72 ± 0.13*  | 0.61 ± 0.18*  |
| Crea (μmol/L) | 24.4 ± 2.1     | 22.8 ± 1.8   | 23.4 ± 1.8    | 22.4 ± 1.5    | 25.2 ± 1.9       | 24.8 ± 1.9   | 27.6 ± 3.0    | 28.2 ± 3.6    |
| Urea (mmol/L) | 5.34 ± 1.08    | 3.85 ± 0.66  | 3.74 ± 0.95   | 4.02 ± 0.38   | 4.56 ± 0.58      | 3.87 ± 0.73  | 3.96 ± 0.68   | 3.73 ± 0.95   |

|          |           |           |           |           |           |           |           |           |
|----------|-----------|-----------|-----------|-----------|-----------|-----------|-----------|-----------|
| CK (U/L) | 742 ± 382 | 622 ± 159 | 492 ± 108 | 594 ± 193 | 475 ± 176 | 368 ± 169 | 752 ± 440 | 525 ± 343 |
|----------|-----------|-----------|-----------|-----------|-----------|-----------|-----------|-----------|

AST, aspartate aminotransferase; ALT, alanine aminotransferase; ALP, alkaline phosphatase; TBIL, total bilirubin; CHOL, total cholesterol; Crea, creatinine; CK, creatine kinase; Data are presented as Mean±SD, measured after 14-day treatment, \*  $P < 0.05$ , vs. the respective control group.

**Table S4** Selected biochemistry parameters of toxicity in rhesus monkey ( $n = 40$ ).

|               | male         |              |               |               | female        |                |               |               |
|---------------|--------------|--------------|---------------|---------------|---------------|----------------|---------------|---------------|
|               | control      | 20 µg/kg     | 60 µg/kg      | 300 µg/kg     | control       | 20 µg/kg       | 60 µg/kg      | 300 µg/kg     |
| AST (U/L)     | 33.2 ± 6.6   | 37.6 ± 5.9   | 45.9 ± 9.2    | 47.9 ± 15.5   | 35.5 ± 2.1    | 37.1 ± 5.9     | 46.6 ± 13.4   | 42.6 ± 7.1    |
| ALT (U/L)     | 40.6 ± 4.7   | 53.3 ± 32.2  | 47.3 ± 13.3   | 34.3 ± 6.6    | 31.9 ± 4.1    | 41.0 ± 7.4     | 56.9 ± 23.8*  | 34.3 ± 6.6    |
| TBIL (µmol/L) | 4.0 ± 2.5    | 4.0 ± 1.3    | 5.4 ± 1.1     | 9.4 ± 6.0     | 3.1 ± 0.9     | 3.5 ± 1.2      | 5.4 ± 2.1     | 4.7 ± 1.7     |
| CK (U/L)      | 144 ± 27     | 161 ± 57     | 129 ± 47      | 123 ± 49      | 169 ± 32      | 123 ± 11       | 130 ± 32      | 102 ± 38 *    |
| CHOL (mmol/L) | 3.37 ± 0.67  | 2.75 ± 0.34  | 2.21 ± 0.44 * | 2.11 ± 0.26 * | 3.14 ± 0.43   | 3.02 ± 0.45    | 2.74 ± 0.54   | 2.16 ± 0.80   |
| Crea (µmol/L) | 46.8 ± 2.0   | 49.4 ± 4.0   | 46.6 ± 8.4    | 45.4 ± 6.3    | 44.6 ± 12.4   | 47.4 ± 8.6     | 53.6 ± 9.6    | 45.4 ± 4.7    |
| Urea (mmol/L) | 6.48 ± 1.54  | 5.82 ± 0.82  | 6.56 ± 2.44   | 5.20 ± 1.13   | 5.60 ± 1.57   | 6.44 ± 0.81    | 6.54 ± 1.17   | 4.88 ± 1.37   |
| ALP (U/L)     | 367.8 ± 94.8 | 335.4 ± 92.5 | 299.8 ± 106.8 | 268.6 ± 79.1  | 508.6 ± 121.5 | 329.4 ± 104.6* | 260.2 ± 65.2* | 191.8 ± 37.4* |

Data are presented as mean±SD, measured after 28-day treatment; \* $P < 0.05$ , vs. the respective control group.

**Table S5** Summary of the toxicokinetics parameters of TB001 in rhesus monkey ( $n = 30$ ).

| dose (µg/kg) | day | AUC <sub>last</sub> (h·ng/mL) |      | C <sub>max</sub> (ng/mL) |      |                    |      | T <sub>max</sub> (h) |         |         |        |         |         |     |     |
|--------------|-----|-------------------------------|------|--------------------------|------|--------------------|------|----------------------|---------|---------|--------|---------|---------|-----|-----|
|              |     | Female ( $n = 5$ )            |      | Male ( $n = 5$ )         |      | Female ( $n = 5$ ) |      | Male ( $n = 5$ )     |         |         |        |         |         |     |     |
|              |     | Mean                          | SD   | Mean                     | SD   | Mean               | SD   | Median               | Minimal | Maximum | Median | Minimal | Maximum |     |     |
| 20           | 1   | 106                           | 13.1 | 136                      | 20.8 | 23.7               | 3.85 | 33.9                 | 5.30    | 1.0     | 1.0    | 2.0     | 1.0     | 1.0 | 2.0 |
|              | 28  | 102                           | 6.98 | 93.9                     | 14.4 | 25.1               | 2.16 | 25.4                 | 5.05    | 1.0     | 1.0    | 2.0     | 1.0     | 1.0 | 2.0 |
| 60           | 1   | 565                           | 89.3 | 422                      | 87.3 | 117                | 19.7 | 91.7                 | 21.5    | 2.0     | 1.0    | 2.0     | 2.0     | 2.0 | 2.0 |
|              | 28  | 841                           | 934  | 369                      | 173  | 180                | 130  | 97.9                 | 38.8    | 2.0     | 1.0    | 2.0     | 1.0     | 1.0 | 2.0 |
| 300          | 1   | 4440                          | 1660 | 3890                     | 1480 | 562                | 203  | 602                  | 186     | 4.0     | 2.0    | 4.0     | 2.0     | 2.0 | 4.0 |
|              | 28  | 3370                          | 1310 | 2890                     | 1010 | 533                | 201  | 590                  | 174     | 2.0     | 1.0    | 2.0     | 2.0     | 1.0 | 2.0 |

**Table S6** Antibodies used for western blotting and IHC.

| Antibody             | Company                   | Dilution | Catalogue number |
|----------------------|---------------------------|----------|------------------|
| AMPK $\alpha$        | Cell Signaling Technology | 1:1000   | #2532S           |
| pSMAD2               | Cell Signaling Technology | 1:1000   | #2455            |
| SMAD2                | Cell Signaling Technology | 1:1000   | #5339            |
| pSMAD3               | Cell Signaling Technology | 1:1000   | #9520            |
| SMAD3                | Cell Signaling Technology | 1:1000   | #9523            |
| TGF- $\beta$         | Abcam                     | 1:1000   | ab269279         |
| GAPDH                | TRANS                     | 1:1000   | HC301            |
| pIKB $\alpha$        | Abcam                     | 1:1000   | ab133462         |
| IKB $\alpha$         | Abcam                     | 1:1000   | ab109509         |
| pNF $\kappa$ B       | Cell Signaling Technology | 1:1000   | #3036            |
| NF $\kappa$ B        | Abcam                     | 1:2000   | ab209795         |
| pJNK                 | Cell Signaling Technology | 1:1000   | #4668            |
| JNK                  | Abcam                     | 1:2500   | ab199380         |
| Cle-caspase3         | Abcam                     | 1:500    | ab2302           |
| XBP-1                | affbiotech                | 1:1000   | AF5110           |
| pIRE1 $\alpha$       | affbiotech                | 1:1000   | 13872-AF7150     |
| IRE1 $\alpha$        | affbiotech                | 1:1000   | 11445-DF7709     |
| GRP78                | Proteintech               | 1:1000   | 11587            |
| caspase3             | Abcam                     | 1:5000   | ab32351          |
| Col1 $\alpha$        | Cell Signaling Technology | 1:1000   | #72026           |
| NOX1                 | Abcam                     | 1:1000   | ab131088         |
| NOX4                 | Abcam                     | 1:1000   | ab79971          |
| CD68                 | Boster                    | 1:100    | BM4593           |
| $\alpha$ -SMA        | Abcam                     | 1:1000   | ab7817           |
| Goat anti-Rabbit IgG | Zsbio                     | 1:5000   | ZDR-5118         |
| Goat anti-Mouse IgG  | Zsbio                     | 1:5000   | ZDR-5307         |

**Table S7** Primer sequences of mouse gene for real-time PCR.

| Mouse gene                     | Forward primer          | Reverse primer              |
|--------------------------------|-------------------------|-----------------------------|
| <i>Pdgf</i>                    | TCCATGCTAGACTCAGAAGTCA  | TCCCGGTGGACACAATTTTTC       |
| <i>Timp1</i>                   | CCTGGTCATAAGGGCTAAATTC  | TTAGTCATCTTGATCTTATAACGCTGC |
| <i>Fn</i>                      | ATGTGGACCCCTCCTGATAGT   | GCCCAGTGATTTCAGCAAAGG       |
| <i>Tnf-<math>\alpha</math></i> | AAAGCATGATCCGAGATGTG    | AGCAGGAATGAGAAGAGGCT        |
| <i>F4/80</i>                   | CCCCAGTGTCCTTACAGAGTG   | GTGCCCAGAGTGGATGTC T        |
| <i><math>\alpha</math>-Sma</i> | GTCCCAGACATCAGGGAGTAA   | TCGGATACTTCAGCGTCAGGA       |
| <i>Tgf-<math>\beta</math></i>  | CTCCCGTGGCTTCTAGTGC     | GCCTTAGTTTGGACAGGATCTG      |
| <i>Mmp2</i>                    | CCAGAAGGCGAACAGACTG     | TGGGCCGGAGACCTAAAGAG        |
| <i>Mmp9</i>                    | GCGCCACCACAGCCAATATG    | TGGATGCCGTCTATGTCTCTTTA     |
| <i>Tnf-<math>\alpha</math></i> | AAAGCATGATCCGAGATGTG    | AGCAGGAATGAGAAGAGGCT        |
| <i>Il-1</i>                    | GCAACTGTTCCCTGAACTCAACT | ATCTTTTGGGGTCCGTCAACT       |
| <i>Il-6</i>                    | AGTTGCCTTCTTGGGACTGA    | TCCACGATTTCCAGAGAAC         |

|                                |                       |                         |
|--------------------------------|-----------------------|-------------------------|
| <i>Pai-1</i>                   | TTCAGCCCTTGCTTGCCCTC  | ACACTTTTACTCCGAAGTCGGT  |
| <i>Fas</i>                     | TATCAAGGAGGCCCATTTTGC | TGTTTCCACTTCTAAACCATGCT |
| <i>Fasl</i>                    | TCCGTGAGTTCACCAACCAAA | GGGGGTTCCCTGTAAATGGG    |
| <i>Bid</i>                     | GAGATGGAGGCAACCAAACTG | CTGCGCGTTGTACTGATGT     |
| <i>Bim</i>                     | GCTCCTGTGCAATCCGTATC  | GCCCCTACCTCCCTACAGAC    |
| <i>Bcl2</i>                    | GTCGCTACCGTCGTGACTTC  | CAGACATGCACCTACCCAGC    |
| <i>Gapdh</i>                   | AATGTGTCCGTGCGTGGATCT | AGACAACCTGGTCCTCAGTG    |
| <i>Il-1<math>\beta</math></i>  | CTCACAAGCAGAGCACAAGC  | TCCAGCCCATACTTTAGGAA    |
| <i>Tnf-<math>\alpha</math></i> | CCCTCACACTCAGATCATCT  | GCTACGACGTGGGCTACAG     |
| <i>Il-4</i>                    | CATGCACGGAGATGGATGTG  | ACCTTGGAAGCCCTACAGAC    |
| <i>Il-5</i>                    | AAAGAGAAGTGTGGCGAGGA  | ACCAAGGAACTCTTGCAGGT    |
| <i>Il-13</i>                   | GCAGCATGGTATGGAGTGTG  | GGAATCCAGGGCTACACAGA    |
| <i>Caspase-1</i>               | CACAGCTCTGGAGATGGTGA  | GGTCCCACATATTCCCTCCT    |
| <i>Caspase-3</i>               | GTCATCTCGCTCTGGTACGG  | CACACACACAAAGCTGCTCC    |
| <i>Caspase-4</i>               | CCGAGACAAAACAGGAGGCT  | GGTGGGCATCTGGGAATGAA    |
| <i>Bax</i>                     | CAAGAAGCTGAGCGAGTGTC  | GTCCACGTCAGCAATCATCC    |
| <i>Gpr78</i>                   | GGTGGGCAAACCAAGACATT  | TCAGTCCAGCAATAGTGCCA    |
| <i>Xbp-1</i>                   | GCTGCGGAGGAAACTGAAA   | CAAATCCACCACTTGCTGCT    |
| <i>Perk</i>                    | CGTCCGAAGCTTCTCCCTAT  | CTCTGGGCTCCTCCTTACTG    |

**Table S8** Target sequences for AAV9-RNAi mediated GCGR and GLP-1R knockdown.

| AAV9-RNAi          | Target sequence       |
|--------------------|-----------------------|
| AAV9-Control-shRNA | CGCTGAGTACTTCGAAATGTC |
| AAV9-GLP-1R-shRNA  | CAGCGCATCTTCAAGCTGTAT |
| AAV9-GCGR-shRNA    | TCCCAACACCACTGCCAACAT |
